# Supplementary material for: Toxic heavy metal concentrations in multiple sclerosis patients: A systematic review and meta-analysis
Source: PubMed Central journal article supplement (PMC8678057; doi:10.17179/excli2021-3484), 2021-11-19
Supplement: EXCLI-20-1571-s-001.pdf [file EXCLI-20-1571-s-001.pdf]

## Supplementary information to:

### Review article:

# TOXIC HEAVY METAL CONCENTRATIONS IN MULTIPLE SCLEROSIS PATIENTS: A SYSTEMATIC REVIEW AND META-ANALYSIS

Sorour Sarihi<sup>1</sup> , Maryam Niknam<sup>2</sup> , Sanaz Mahjour<sup>3</sup> , Mahnaz Hosseini-Bensenjan<sup>4</sup> ,  
Fatemeh Moazzen<sup>5</sup> , Sahar Soltanabadi<sup>6\*</sup> , Hamed Akbari<sup>7,8</sup> 

<sup>1</sup> Shiraz HIV/AIDS Research Center, Institute of Health, Shiraz University of Medical Sciences, Shiraz, Iran

<sup>2</sup> Department of Biochemistry, School of Medicine, Shiraz University of Medical Sciences, Shiraz, Iran

<sup>3</sup> Department of Psychiatry and Behavioral Sciences Psychiatry, Northwestern University, Feinberg School of Medicine, USA

<sup>4</sup> Hematology Research Center, Shiraz University of Medical Sciences, Shiraz, Iran

<sup>5</sup> Department of Hematology, Faculty of Allied Medicine, Bushehr University of Medical Sciences, Bushehr, Iran

<sup>6</sup> Student Research Committee, Shiraz University of Medical Sciences, Shiraz, Iran

<sup>7</sup> Department of Biochemistry, School of Medicine, Kerman University of Medical Sciences, Kerman, Iran

<sup>8</sup> Student Research Committee, School of Medicine, Kerman University of Medical Sciences, Kerman, Iran

\* **Corresponding author:** Sahar Soltanabadi, Student Research Committee, Shiraz University of Medical Sciences, Shiraz, Iran. Tel:+98 917 713 3214;  
E-mail: [saharsoltany@gmail.com](mailto:saharsoltany@gmail.com)

<http://dx.doi.org/10.17179/excli2021-3484>

This is an Open Access article distributed under the terms of the Creative Commons Attribution License (<http://creativecommons.org/licenses/by/4.0/>).

**Supplementary Table 1:** Overall quality scores of including studies using Newcastle-Ottawa Scale (NOS) tool

| Author name          | Study design | Selection | Comparability | Exposure/<br>outcome | Overall quality<br>assessment<br>score |
|----------------------|--------------|-----------|---------------|----------------------|----------------------------------------|
| Alimonti             | Case-control | ****      | *             | ***                  | 8                                      |
| Aliomrani, 2016      | Case-control | ****      | *             | ***                  | 8                                      |
| Aliomrani, 2017      | Case-control | ****      | *             | ***                  | 8                                      |
| Juybari              | Case-control | ****      | *             | ***                  | 8                                      |
| Dehghani-firoozabadi | Case-control | ****      | *             | ***                  | 8                                      |
| Nashmi               | Case-control | ***       | *             | ***                  | 7                                      |
| Forte                | Case-control | ****      | *             | ***                  | 8                                      |
| Ghoreishi            | Case-control | ***       | *             | ***                  | 7                                      |
| Giacoppo             | Case-control | ***       | *             | ***                  | 7                                      |
| Janghorbani          | Case-control | ****      | *             | ***                  | 8                                      |
| Madeddu              | Case-control | ***       | *             | ***                  | 7                                      |
| Attar                | Case-control | ****      | *             | ***                  | 8                                      |
| Paknejad             | Case-control | ****      | *             | ***                  | 8                                      |
| Ristori              | Cohort       | ****      | *             | ***                  | 8                                      |
| Visconti             | Case-control | ***       | *             | ***                  | 7                                      |
| Yousefi              | Case-control | ****      | *             | ***                  | 8                                      |

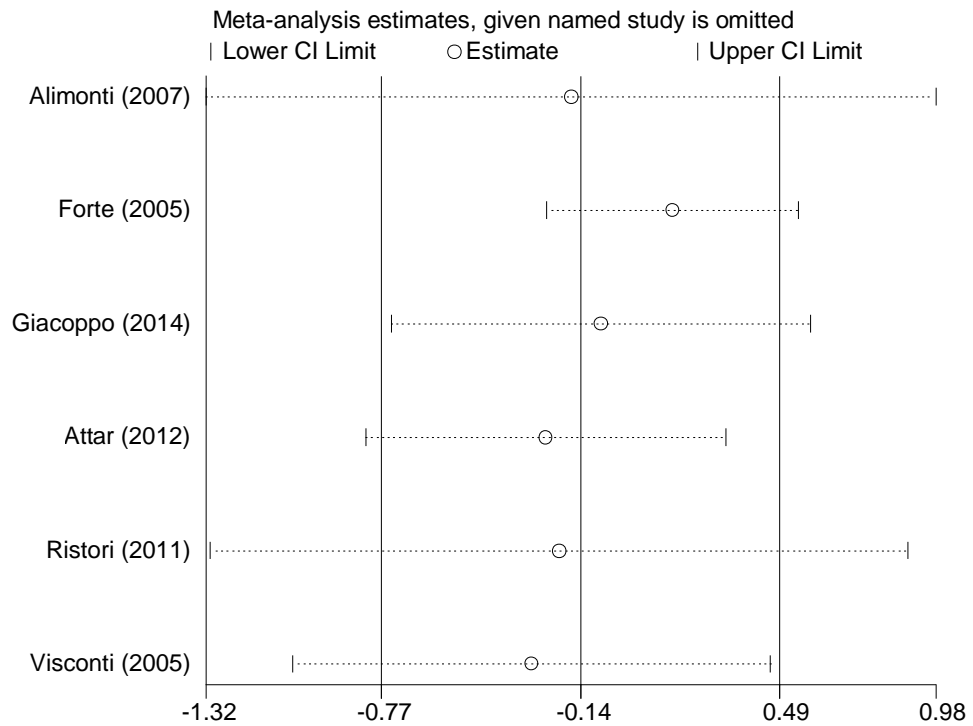

**Supplementary Figure 1:** Sensitivity analysis findings after excluding each study for mercury (Hg)

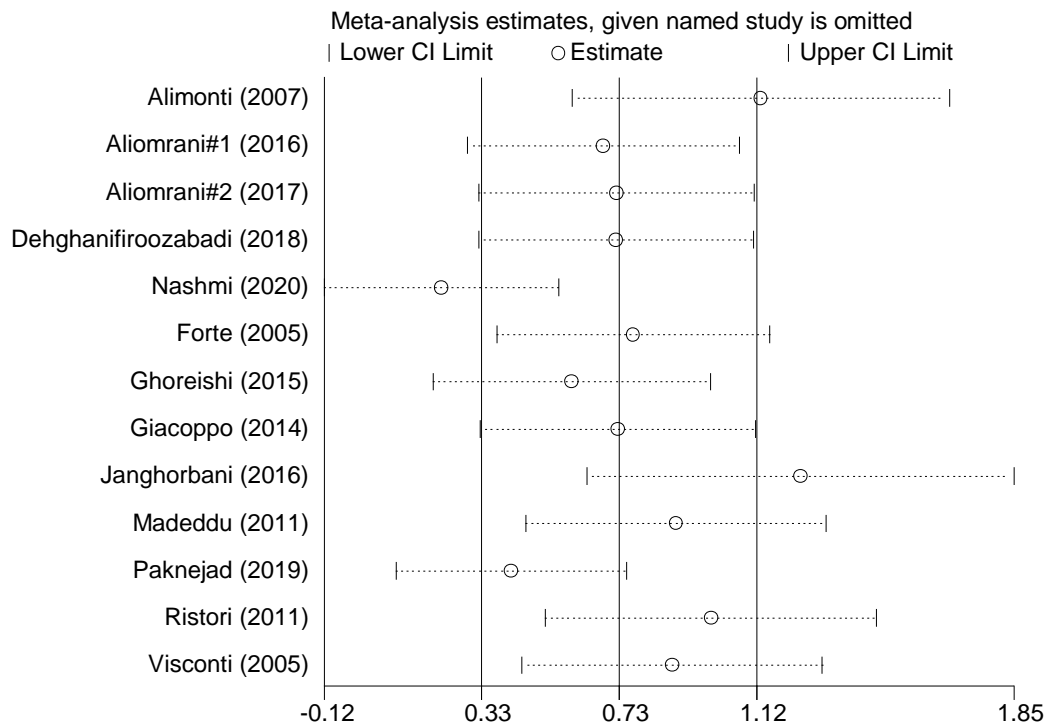

**Supplementary Figure 2:** Sensitivity analysis findings after excluding each study for lead (Pb)

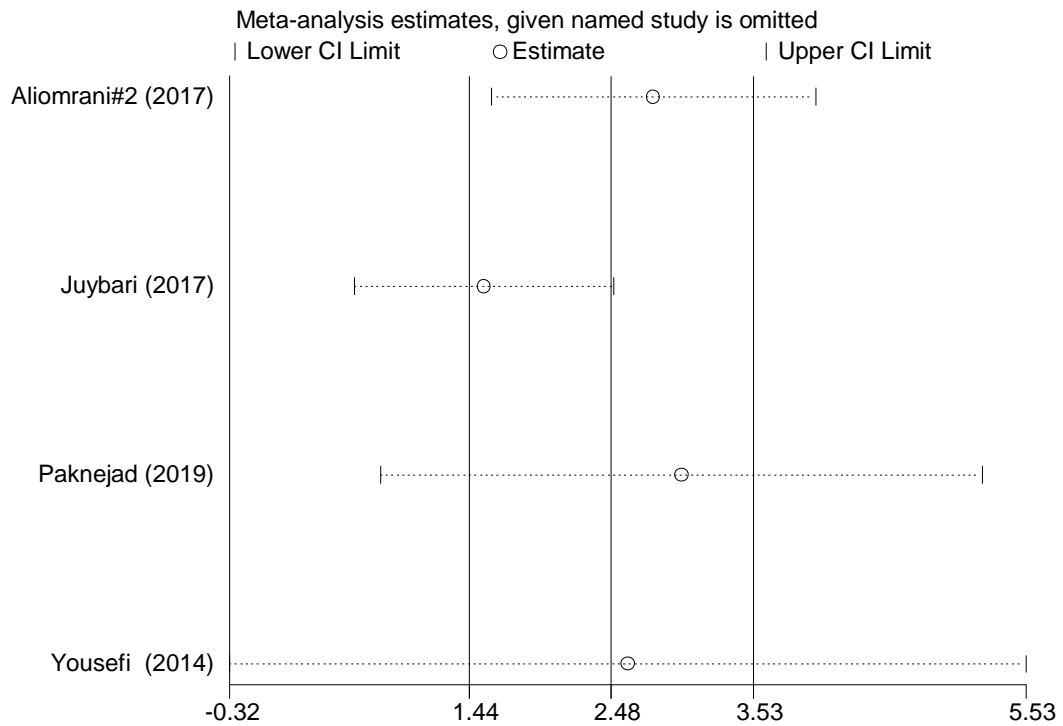

**Supplementary Figure 3:** Sensitivity analysis findings after excluding each study for Arsenic (As)

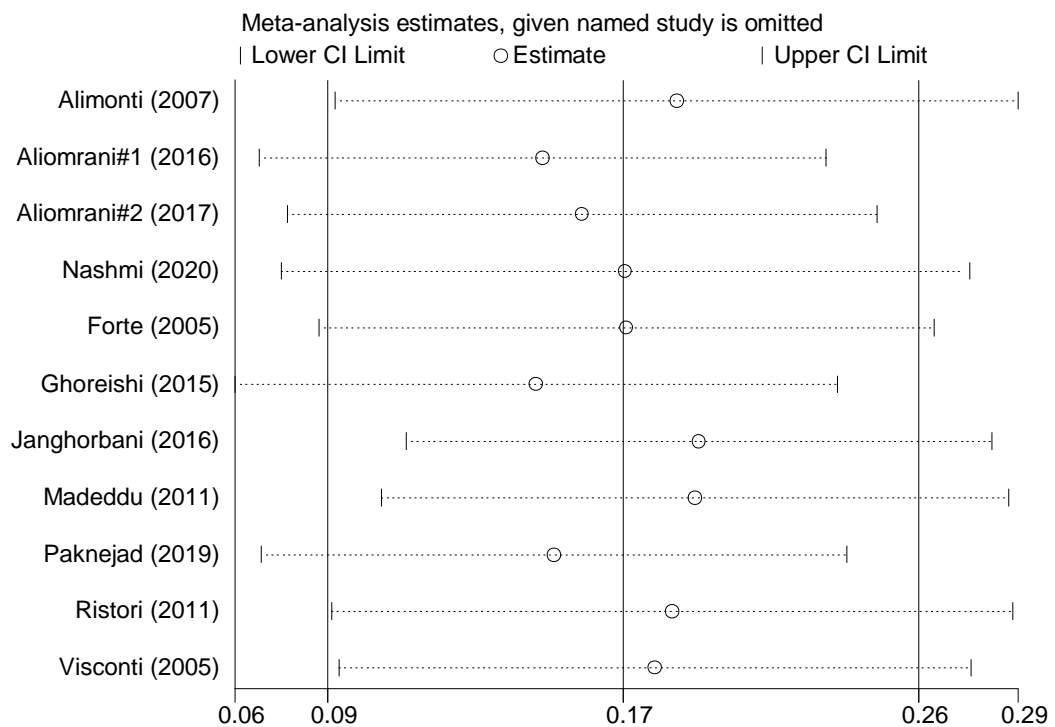

**Supplementary Figure 4:** Sensitivity analysis findings after excluding each study for Cadmium (Cd)
